# Supplementary material for: Transcriptome Analysis of Post-Mortem Brain Tissue Reveals Up-Regulation of the Complement Cascade in a Subgroup of Schizophrenia Patients
Source: MDPI journal article supplement (doi:10.3390/genes12081242), 2021-08-13

## **Supplementary Tables**

**Table S1 (separate file). Information for each individual sample used in this study.**

**Table S2 (separate file). List of genes tested for differential expression and differentially expressed genes (adj. p-value < 0.05).**

**Table S3 (separate file). Gene set analysis of significant modules from WGCNA of cluster 1 vs controls.**

**Table S4 (separate file). Gene set analysis of modules significant from module preservation analysis.**

Supplementary Figures

**Figure S1. Principal component analysis.** The plot shows cases (blue) and controls (red) with no overall specific grouping between cases and controls.

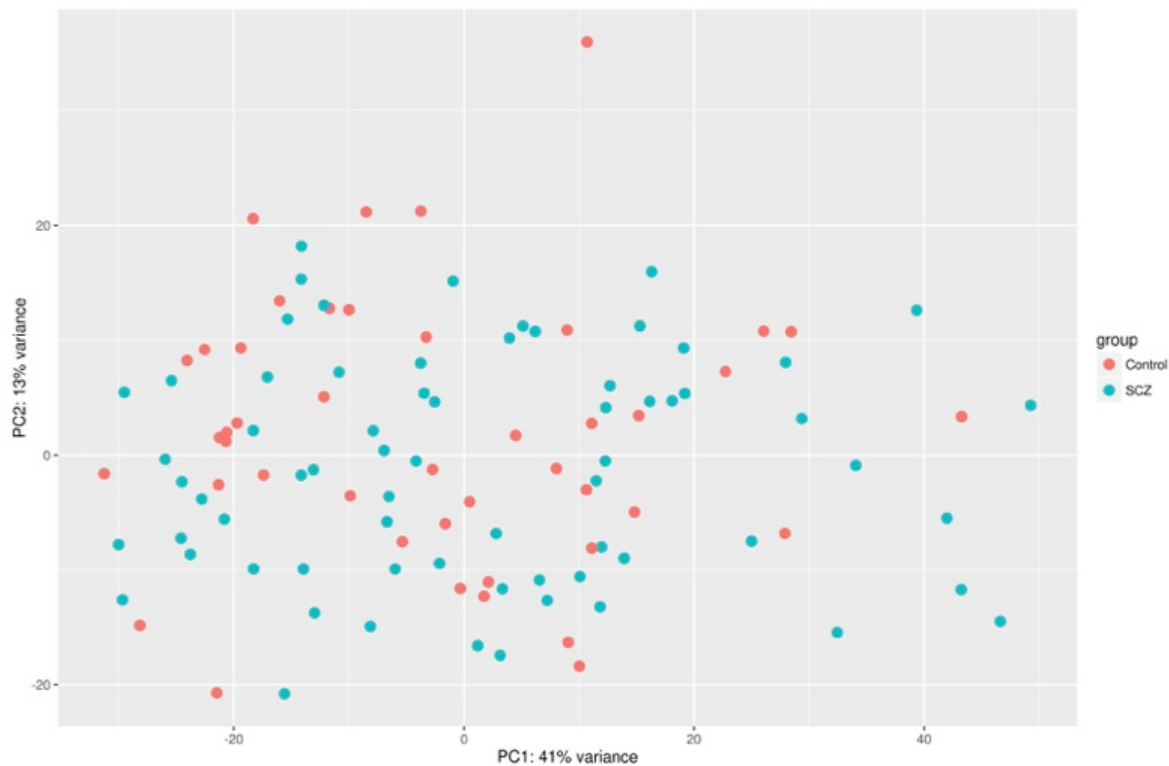

**Figure S2. Estimation of the fraction of cell types in case and control groups based on gene expression profiles.** Results from two different tools are shown (Cibersort top and CellMix bottom). The results show no significant differences between patients and controls.

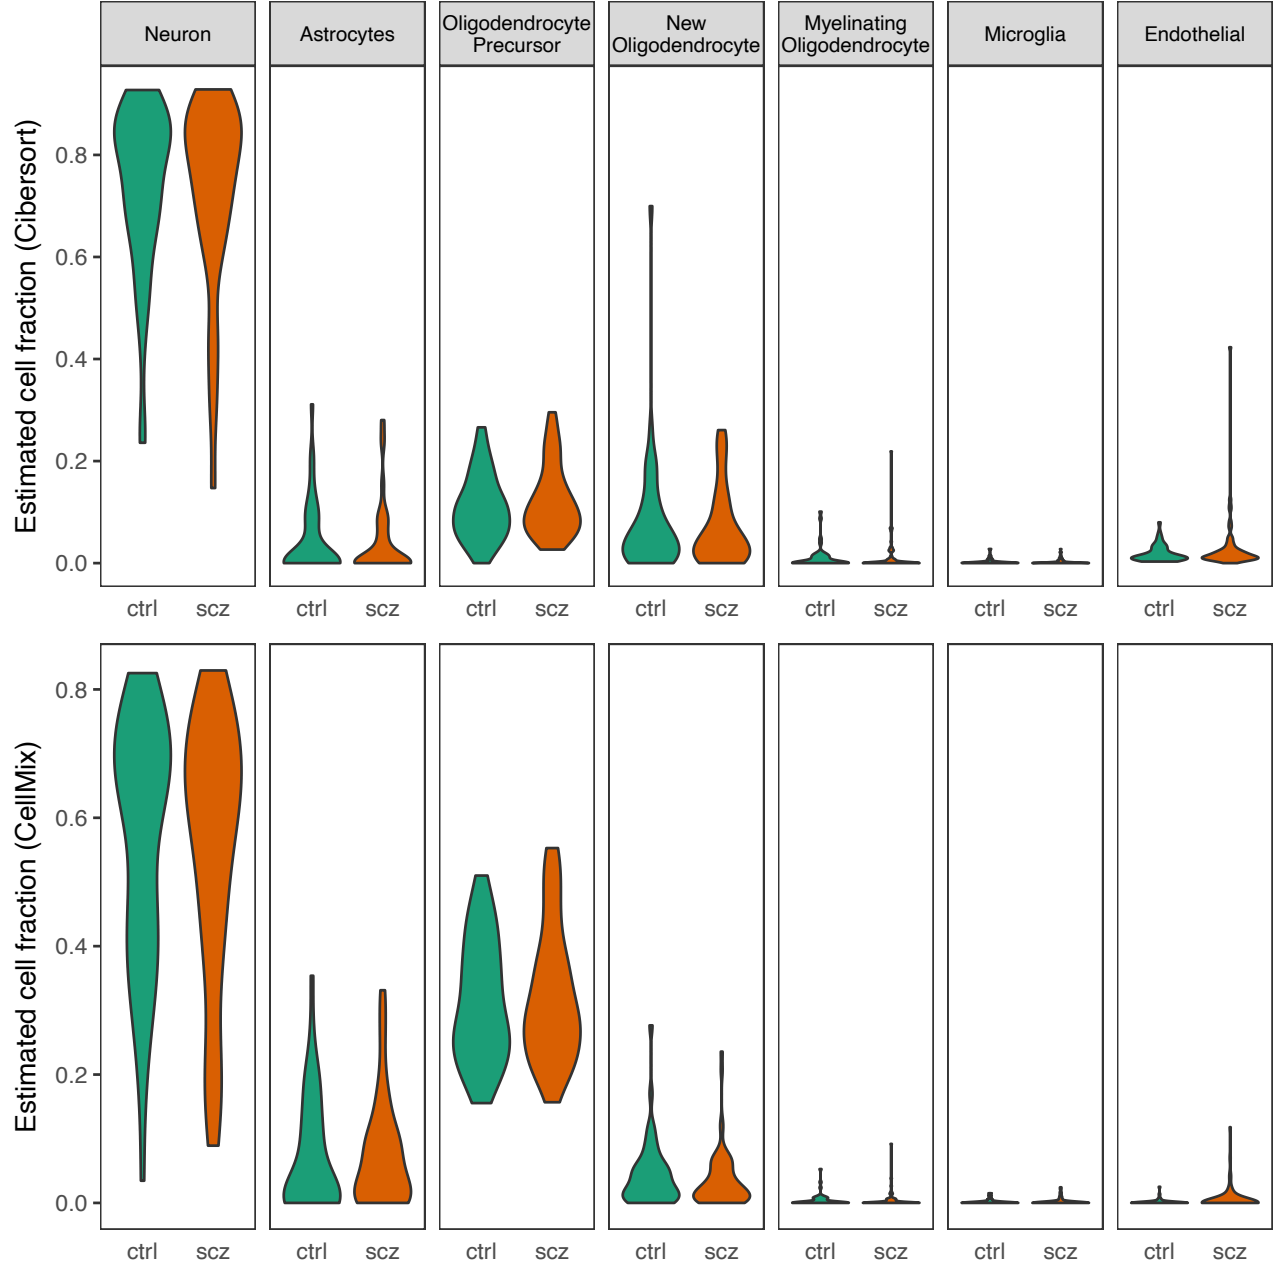

**Figure S3. Module preservation analysis.** The figure shows module preservation scores predicted from three different approaches for control modules in schizophrenia (top) and schizophrenia modules in controls (bottom).

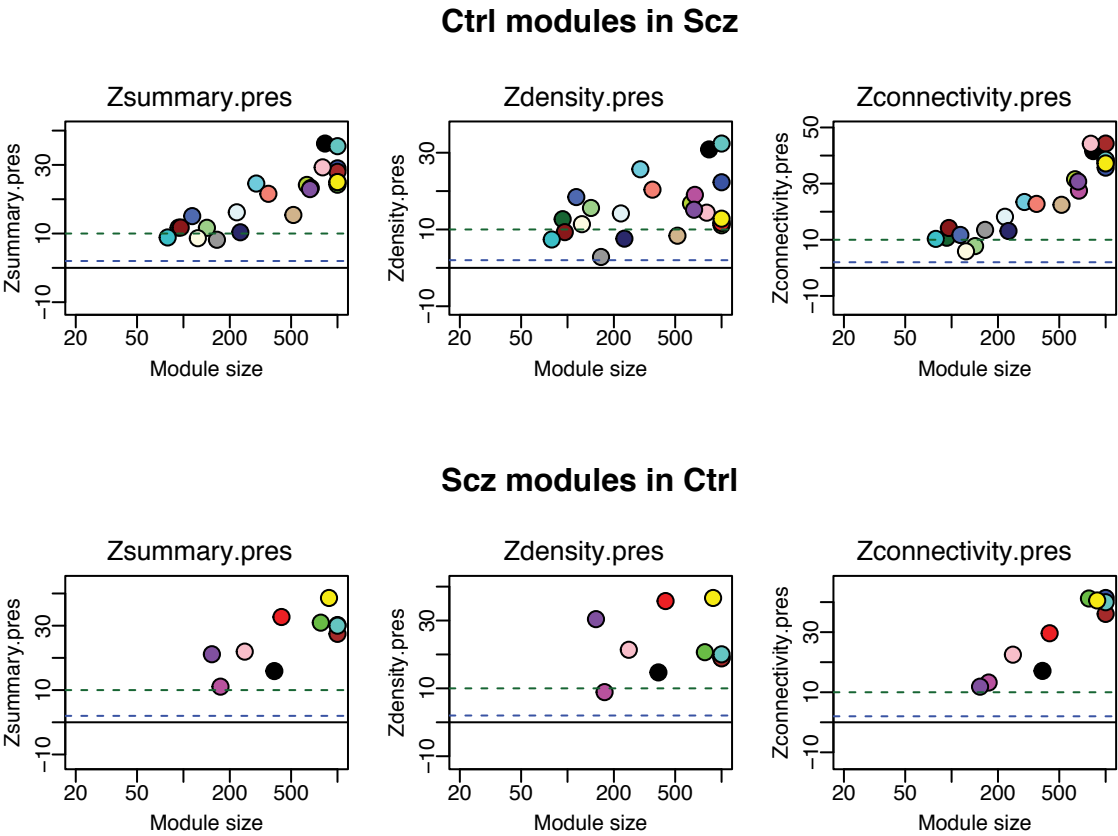

Supplement: s1 [file s1]
